# Supplementary figures and images for: Changes in the Histology of Walnut (Juglans regia L.) Infected with Phomopsis capsici and Transcriptome and Metabolome Analysis
Source: MDPI journal article supplement (doi:10.3390/ijms24054879), 2023-03-02

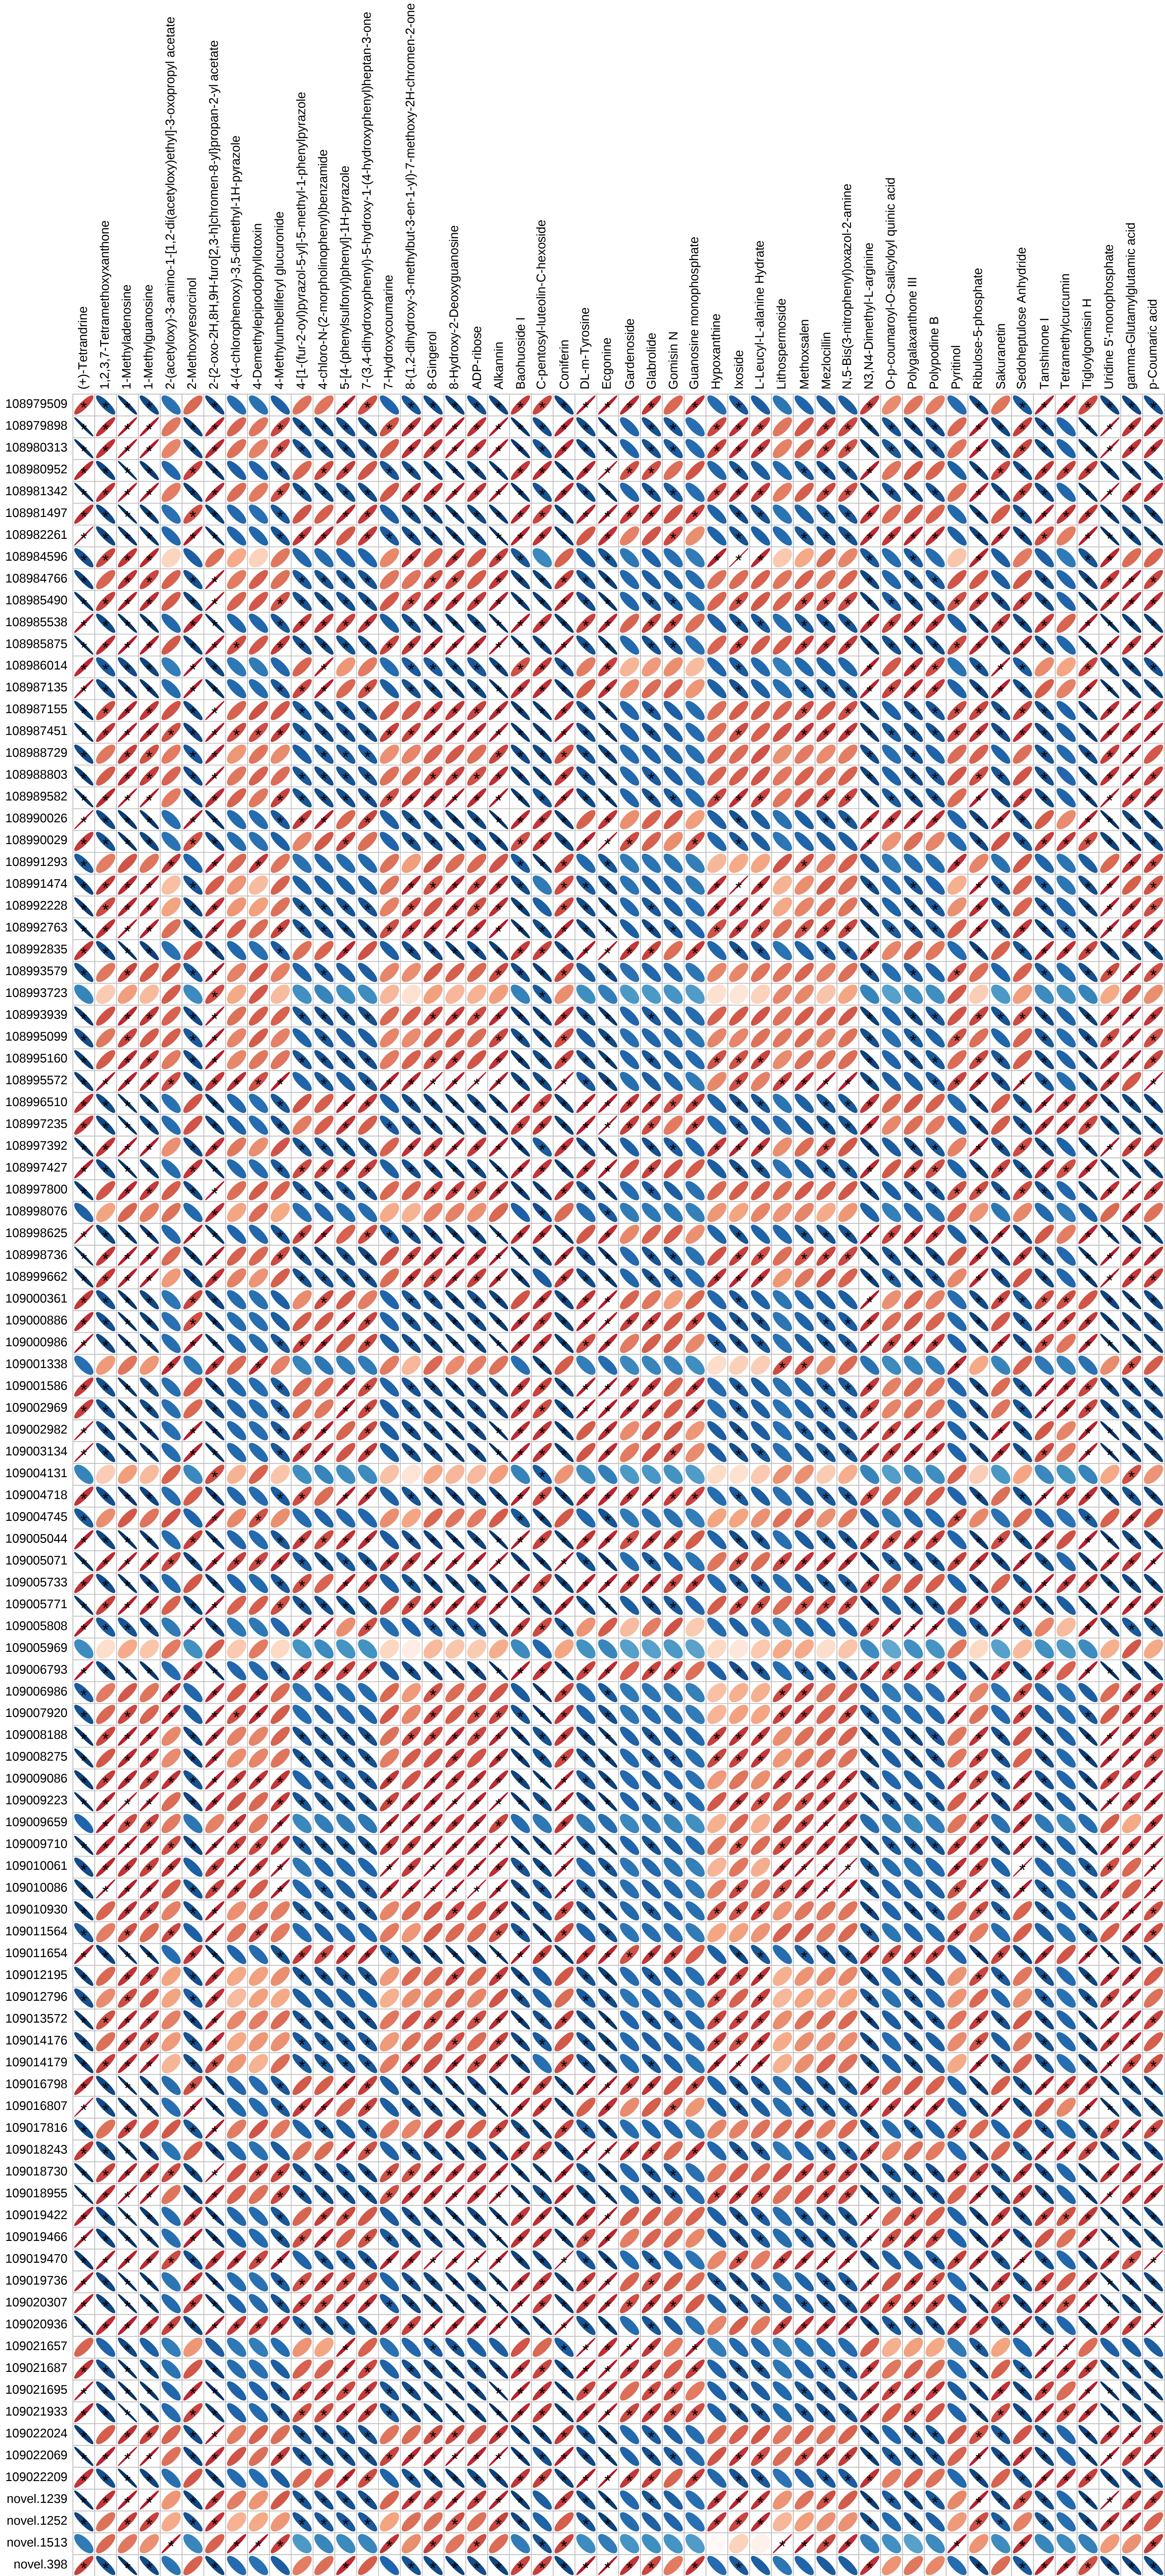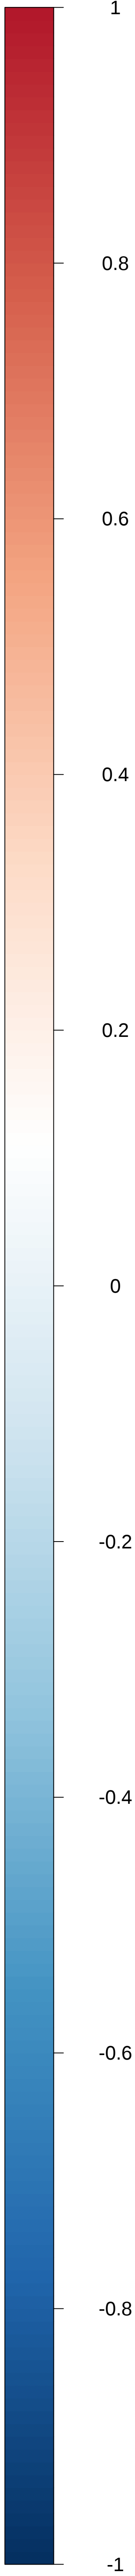

Supplement: s1 [file s1]

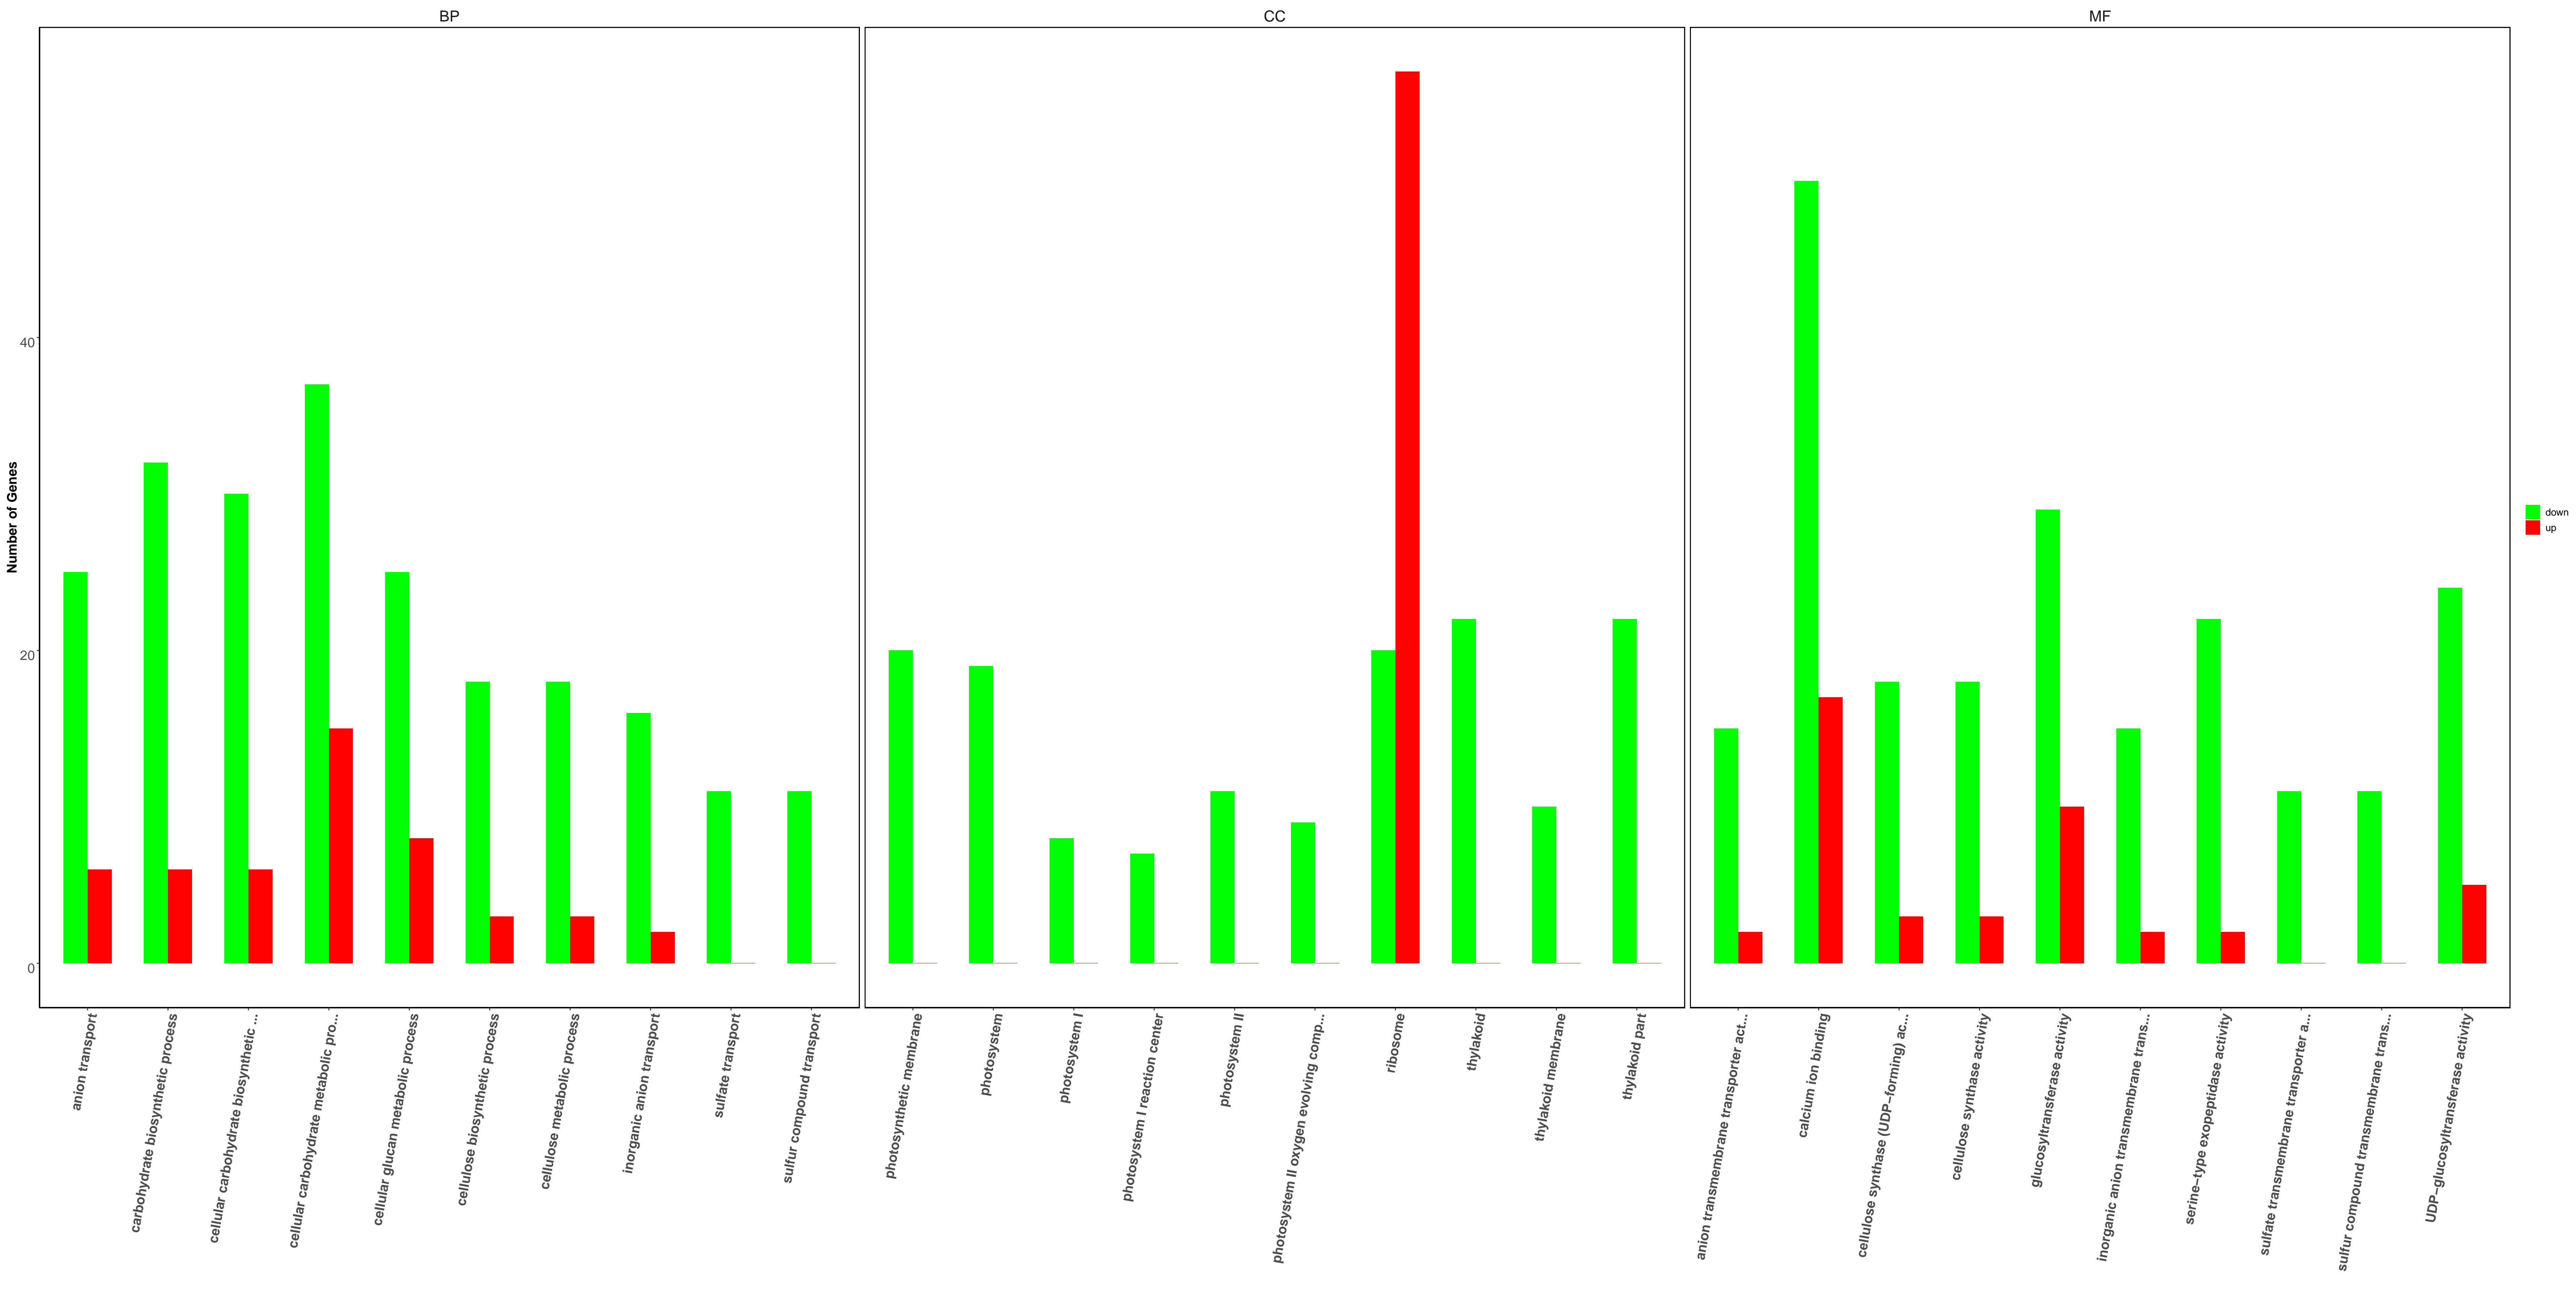

Supplement: s1 [file s1]

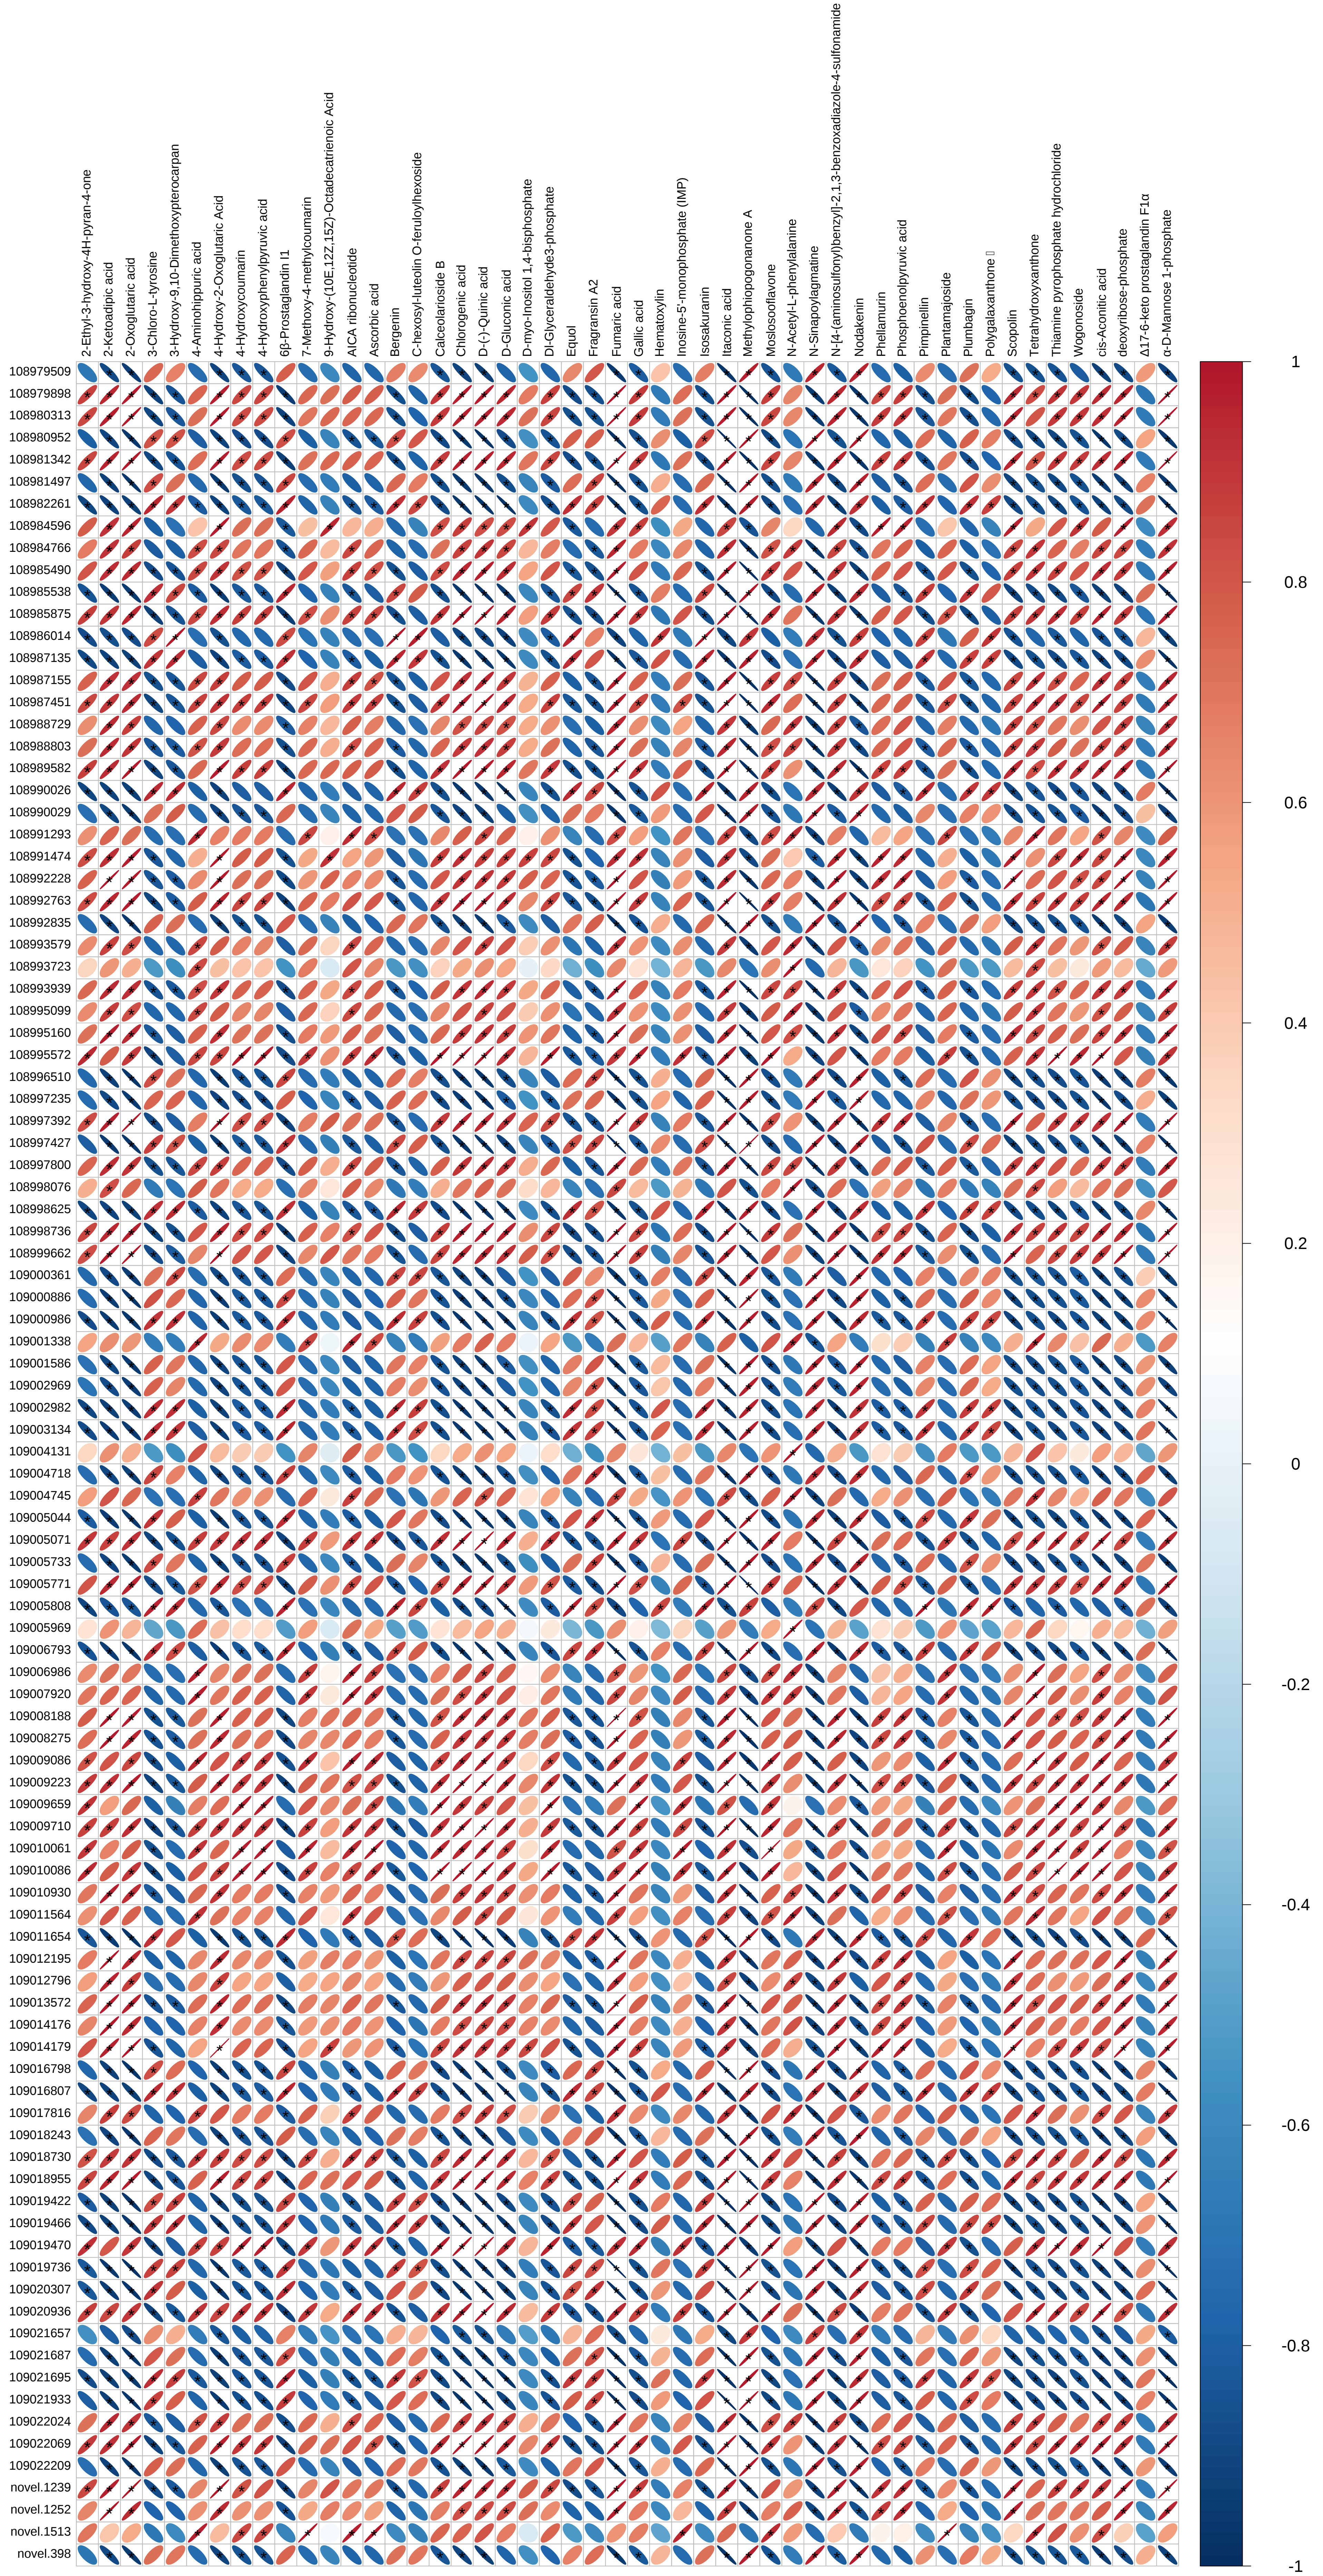

Supplement: s1 [file s1]
